# Supplementary material
Source: PubMed Central journal article supplement (PMC4979231)
Supplement: supp_JCO.2014.57.4111_DS_2014.57.4111.pdf [file supp_JCO.2014.57.4111_DS_2014.57.4111.pdf]

Citrus consumption and risk of cutaneous malignant melanoma  
by Wu, et al

**Supplementary Method:** justification for the covariates included in the analysis

**Table A1.** Characteristics of person-years according to frequency of overall citrus consumption among women and men separately

**Table A2.** Time trends of citrus consumption during the follow-up

**Table A3.** Pearson correlation matrix between intakes of citrus products during the follow-up

**Table A4.** Hazard ratios for incident melanoma according to frequency of citrus consumption among women and men separately

**Table A5.** Sensitivity analyses for the association between citrus consumption and risk of incident melanoma

**Table A6.** Lag analyses for the association between citrus consumption and risk of incident melanoma.

**Table A7.** Pooled multivariable-adjusted hazard ratios for incident melanoma according to frequency of grapefruit consumption in subgroups of host risk factors and sun exposure related factors.

**Table A8.** Pooled multivariable-adjusted hazard ratios for incident melanoma according to frequency of grapefruit consumption in subgroups of additional potential confounders.

## **Supplementary Method: justification for the covariates included in the analysis**

The present study included a number of known melanoma risk factors and potential confounders in the statistical analysis in order to better estimate the association between citrus consumption and risk of melanoma. It has been documented as early as 1980s that the effects of pigmentary traits (e.g., susceptibility to sunburn), benign nevi (mole count), ethnic origin, and family history as risk factors of melanoma were largely independent of one another.<sup>1</sup> Gandini et al. also conducted a series of meta-analyses which provided evidence for the associations between different risk factors (nevi, sun exposure, and phenotypic factors) and risk of melanoma.<sup>2-4</sup>

In view that the potential photocarcinogenic effect of psoralens requires the presence of UV radiation, sufficient adjustment for sun exposure is critical for the investigation of the association between citrus consumption and melanoma risk. We included three indicators of sun exposure in the analysis. Annual UV flux at residence is an estimate of the amount of UV radiation reaching the earth's surface within one year and has been associated with risk of melanoma.<sup>5</sup> Time spent in direct sunlight is an important variable to denote exposure duration to solar UV in addition to the UV flux. Severe/blistering sunburn is believed to result from high doses of intense UV radiation exposure in short increments of time and is therefore considered as a measure of acute sun exposure, whereas it is also a measure of host cutaneous sensitivity to sun exposure.<sup>6</sup>

Body mass index, smoking status, physical activity, and coffee intake are several lifestyle-related factors that may be associated citrus consumption (e.g., participants with higher physical activity levels were more likely to consume citrus products whereas smokers were less likely to consume citrus products, see Table 1 and Table A1), and thereby may have biased the association between citrus consumption and melanoma risk. A number of previous studies have investigated the potential association between these lifestyle-related factors and risk of melanoma.<sup>7-11</sup> Particularly, caffeine has been shown to prevent UV-induced carcinogenesis<sup>12</sup> and to inhibit growth of melanoma cells in experimental studies,<sup>13</sup> which is supported by epidemiologic studies.<sup>10,11</sup> To exclude potential residual confounding from lifestyle-related factors, it would be necessary to adjust for these variables in the analysis and perform stratified analyses according to these variables in order to demonstrate the independence of the association between citrus consumption and risk of melanoma. These variables have also been commonly adjusted for in previous studies investigating the health risk associated with dietary exposure.<sup>14-17</sup>

It has been suggested that alcohol intake increases sunburn severity,<sup>18</sup> and a recent meta-analysis supports a positive association between alcohol intake and risk of melanoma.<sup>19</sup> Our analyses also revealed a positive association between alcohol intake and melanoma risk among women and men (data unpublished).<sup>20</sup> As we explained in the manuscript introduction, vitamin C has been shown to be preferentially toxic for melanoma cells in experimental studies.<sup>21</sup> In addition, vitamin C supplement was also positively associated with citrus consumption (Table 1 and Table A1) and would also be necessary to adjust for as a potential confounder. Energy intake is also a lifestyle-related variable and has been commonly included as a covariate the assessment of the association between dietary intake and health risk.<sup>14-17</sup>

It has been demonstrated that female hormones (e.g., estrogen) manifest a variety of biological and immunological effects in the skin.<sup>22</sup> Estrogen may also be an underlying reason for the different prognosis of malignant melanoma among women and men.<sup>23</sup> Given that most of the participants in the NHS were postmenopausal

women at baseline, it would be reasonable to include postmenopausal hormone use as a potential confounder to account for potential gender difference in the assessment of citrus consumption and risk of melanoma.

In the statistical analysis, we used the most updated information for time-varying variables (e.g., body mass index) prior to each follow-up interval to take into account potential changes over the follow-up. Missing data during any follow-up period were coded as a missing indicator category for categorical variables (e.g., smoking status) and with carried-forward values for continuous variables.<sup>24</sup>

## References

1. Holman CDJ, Armstrong BK: Pigmentary traits, ethnic origin, benign nevi, and family history as risk factors for cutaneous malignant melanoma. *J Natl Cancer Inst* 72:257-66, 1984
2. Gandini S, Sera F, Cattaruzza MS, et al: Meta-analysis of risk factors for cutaneous melanoma: I. Common and atypical naevi. *Eur J Cancer* 41:28-44, 2005
3. Gandini S, Sera F, Cattaruzza MS, et al: Meta-analysis of risk factors for cutaneous melanoma: II. Sun exposure. *Eur J Cancer* 41:45-60, 2005
4. Gandini S, Sera F, Cattaruzza MS, et al: Meta-analysis of risk factors for cutaneous melanoma: III. Family history, actinic damage and phenotypic factors. *Eur J Cancer* 41:2040-2059, 2005
5. Fears TR, Bird CC, Guerry Dt, et al: Average midrange ultraviolet radiation flux and time outdoors predict melanoma risk. *Cancer Res* 62:3992-6, 2002
6. Iannacone MR, Wang W, Stockwell HG, et al: Patterns and timing of sunlight exposure and risk of basal cell and squamous cell carcinomas of the skin--a case-control study. *BMC Cancer* 12:417, 2012
7. Pothiwala S, Qureshi AA, Li Y, et al: Obesity and the incidence of skin cancer in US Caucasians. *Cancer Causes Control* 23(5):717-26, 2012
8. Thompson CA, Zhang ZF, Arah OA: Competing risk bias to explain the inverse relationship between smoking and malignant melanoma. *Eur J Epidemiol* 28(7):557-67, 2013
9. Lee TK, MacArthur AC, Gallagher RP, et al: Occupational physical activity and risk of malignant melanoma: the Western Canada Melanoma Study. *Melanoma Res* 19(4):260-6, 2009
10. Veierød MB, Thelle DS, Laake P: Diet and risk of cutaneous malignant melanoma: a prospective study of 50,757 Norwegian men and women. *Int J Cancer* 71(4):600-4, 1997
11. Stensvold I, Jacobsen BK: Coffee and cancer: a prospective study of 43,000 Norwegian men and women. *Cancer Causes Control* 5(5):401-8, 1994
12. Conney AH, Lu YP, Lou YR, et al: Mechanisms of caffeine-induced inhibition of UVB carcinogenesis. *Front Oncol* 3:144, 2013
13. Ohta A, Gorelik E, Prasad SJ, et al: A2A adenosine receptor protects tumors from antitumor T cells. *Proc Natl Acad Sci USA* 103(35):13132-7, 2006
14. Bao Y, Han J, Hu FB, et al: Association of nut consumption with total and cause-specific mortality. *N Engl J Med* 369(21):2001-11, 2013
15. Choi HK, Atkinson K, Karlson EW, et al: Purine-rich foods, dairy and protein intake, and risk of gout in men. *N Engl J Med* 350(11):1093-103, 2004
16. Muraki I, Imamura F, Manson JE, et al: Fruit consumption and risk of type 2 diabetes: results from three prospective longitudinal cohort studies. *BMJ* 347:f5001, 2013

17. Zhang X, Albanes D, Beeson WL, et al: Risk of colon cancer and coffee, tea, and sugar-sweetened soft drink intake: pooled analysis of prospective cohort studies. *J Natl Cancer Inst* 102(11):771-83, 2010
18. Warthan MM, Sewell DS, Marlow RA, et al: The economic impact of acute sunburn. *Arch Dermatol* 139:1003–6, 2003
19. Rota M, Pasquali E, Bellocco R, et al: Alcohol drinking and cutaneous melanoma risk: a systematic review and dose-risk meta-analysis. *Br J Dermatol* 170(5):1021-8, 2014
20. Rivera A, Han J, Li T, et al: Alcohol intake and risk of incident melanoma in US women and men. Data unpublished.
21. Bram S, Froussard P, Guichard M, et al: Vitamin C preferential toxicity for malignant melanoma cells. *Nature* 284:629-31, 1980
22. Shah MG, Maibach HI: Estrogen and skin. An overview. *Am J Clin Dermatol* 2:143-50, 2001
23. de Giorgi V, Gori A, Grazzini M, et al: Estrogens, estrogen receptors and melanoma. *Expert Rev Anticancer Ther* 11(5):739-47, 2011
24. Mozaffarian D, Hao T, Rimm EB, et al: Changes in diet and lifestyle and long-term weight gain in women and men. *N Engl J Med* 364:2392-404, 2011

**Table A1. Characteristics of person-years according to frequency of overall citrus consumption among women and men separately.**

|                                                                         | <2/wk     | 2-4/wk    | 5-6/wk    | 1-1.5/d   | ≥1.6/d    |
|-------------------------------------------------------------------------|-----------|-----------|-----------|-----------|-----------|
| <b>Women</b>                                                            |           |           |           |           |           |
| Age (year)                                                              | 58.0±9.7† | 59.9±9.7  | 61.1±9.8  | 60.6±9.9  | 60.7±9.6  |
| Family history of melanoma (%)                                          | 6.5       | 6.7       | 7.3       | 7.3       | 7.0       |
| Red/blonde hair (%)                                                     | 14.6      | 14.8      | 14.7      | 15.1      | 16.3      |
| Arm with moles (%)                                                      | 35.1      | 37.0      | 37.2      | 37.6      | 37.6      |
| Painful burn/blisters sun reaction as a child/adolescent (%)            | 14.9      | 14.3      | 13.8      | 13.2      | 13.6      |
| Number of lifetime blistering sunburns                                  | 8.6±6.9   | 8.7±6.9   | 8.7±6.9   | 8.5±6.9   | 8.4±6.9   |
| Annual UV flux at residence (×10 <sup>-4</sup> Robertson-Berger units)‡ | 125±26    | 124±26    | 123±25    | 121±24    | 120±24    |
| Average time spent in direct sunlight since high school (hrs/wk)        | 4.8±2.7   | 5.0±2.7   | 5.0±2.7   | 4.9±2.7   | 5.0±2.7   |
| Body mass index (kg/m <sup>2</sup> )                                    | 26.2±5.4  | 26.6±5.4  | 26.5±5.3  | 26.0±5.0  | 25.7±5.0  |
| Physical activity (metabolic-equivalents/wk)                            | 13.7±19.7 | 15.8±21.0 | 17.3±21.8 | 18.1±22.7 | 21.1±26.5 |
| Current smoking (%)                                                     | 21.5      | 14.7      | 11.6      | 11.0      | 11.5      |
| Postmenopausal status (%)                                               | 77.0      | 77.5      | 77.5      | 77.4      | 77.3      |
| Current postmenopausal hormone use (%)§                                 | 34.5      | 36.6      | 37.5      | 36.4      | 34.7      |
| Dietary intake                                                          |           |           |           |           |           |
| Grapefruit (serving/d)                                                  | 0.03±0.04 | 0.07±0.09 | 0.12±0.14 | 0.16±0.19 | 0.31±0.32 |
| Grapefruit juice (serving/d)                                            | 0.01±0.03 | 0.03±0.07 | 0.07±0.12 | 0.09±0.18 | 0.23±0.44 |
| Oranges (serving/d)                                                     | 0.06±0.05 | 0.14±0.12 | 0.21±0.17 | 0.24±0.23 | 0.44±0.39 |
| Orange juice (serving/d)                                                | 0.06±0.06 | 0.20±0.14 | 0.40±0.24 | 0.72±0.33 | 1.09±0.69 |
| Total energy (kcal/d)                                                   | 1574±442  | 1678±434  | 1764±435  | 1839±446  | 2002±468  |
| Alcohol (g/d)                                                           | 5.8±11.4  | 5.3±10.0  | 5.4±9.5   | 5.9±9.8   | 6.3±10.4  |
| Coffee (cup/d)                                                          | 1.8±1.6   | 1.7±1.5   | 1.6±1.4   | 1.5±1.4   | 1.5±1.4   |
| Total vitamin C intake (mg/d)                                           | 280±328   | 313±313   | 348±308   | 382±321   | 476±351   |
| Vitamin C from diet (mg/d)                                              | 91±44     | 121±41    | 151±43    | 180±47    | 248±67    |
| Vitamin C from supplement (mg/d)                                        | 189±321   | 192±308   | 197±303   | 203±315   | 228±341   |
| <b>Men</b>                                                              |           |           |           |           |           |
| Age (year)                                                              | 58.5±9.9  | 60.1±10.2 | 61.5±10.4 | 61.6±10.7 | 61.9±10.6 |

|                                                                         |           |           |           |           |           |
|-------------------------------------------------------------------------|-----------|-----------|-----------|-----------|-----------|
| Family history of melanoma (%)                                          | 4.0       | 4.3       | 4.0       | 4.1       | 3.9       |
| Red/blonde hair (%)                                                     | 12.7      | 12.8      | 13.0      | 12.8      | 12.4      |
| Arm with moles (%)                                                      | 31.0      | 31.0      | 31.7      | 31.4      | 31.2      |
| Painful burn/blisters sun reaction as a child/adolescent (%)            | 23.0      | 22.1      | 23.1      | 22.4      | 21.7      |
| Number of lifetime blistering sunburns                                  | 13.0±12.0 | 12.8±12.0 | 13.0±12.1 | 12.4±11.9 | 12.5±12.1 |
| Annual UV flux at residence ( $\times 10^{-4}$ Robertson-Berger units)‡ | 133±28    | 131±27    | 130±27    | 127±27    | 127±27    |
| Average time spent in direct sunlight since high school (hrs/wk)        | 9.1±5.4   | 9.2±5.4   | 9.3±5.5   | 9.1±5.5   | 9.1±5.5   |
| Body mass index (kg/m <sup>2</sup> )                                    | 26.1±4.4  | 26.2±4.1  | 26.1±4.1  | 25.7±4.0  | 25.7±4.0  |
| Physical activity (metabolic-equivalents/wk)                            | 27.6±37.4 | 31.6±37.6 | 34.3±39.9 | 34.2±39.5 | 39.5±44.7 |
| Current smoking (%)                                                     | 9.5       | 6.5       | 5.2       | 4.9       | 4.2       |
| Dietary intake                                                          |           |           |           |           |           |
| Grapefruit (serving/d)                                                  | 0.02±0.04 | 0.07±0.09 | 0.13±0.15 | 0.17±0.21 | 0.35±0.43 |
| Grapefruit juice (serving/d)                                            | 0.01±0.03 | 0.03±0.07 | 0.06±0.13 | 0.08±0.19 | 0.21±0.47 |
| Oranges (serving/d)                                                     | 0.06±0.05 | 0.15±0.13 | 0.22±0.19 | 0.26±0.26 | 0.55±0.57 |
| Orange juice (serving/d)                                                | 0.06±0.06 | 0.20±0.15 | 0.39±0.24 | 0.69±0.35 | 1.15±0.87 |
| Total energy (kcal/d)                                                   | 1810±544  | 1902±534  | 1982±547  | 2046±548  | 2223±581  |
| Alcohol (g/d)                                                           | 11.9±17.1 | 11.3±15.4 | 11.1±14.7 | 11.3±14.5 | 10.5±14.4 |
| Coffee (cup/d)                                                          | 1.2±1.5   | 1.0±1.3   | 0.9±1.2   | 0.9±1.2   | 0.8±1.2   |
| Total vitamin C intake (mg/d)                                           | 321±396   | 370±392   | 406±387   | 450±405   | 565±434   |
| Vitamin C from diet (mg/d)                                              | 92±46     | 122±42    | 153±45    | 185±49    | 272±92    |
| Vitamin C from supplement (mg/d)                                        | 229±390   | 248±387   | 253±382   | 265±399   | 293±419   |

\* All variables other than age have been standardized to the age distribution of the cohort.

† Mean±standard deviation (for all such values).

‡ Estimate of the amount of UV radiation reaching the earth's surface of the residence within one year.

§ Percentage among postmenopausal women.

**Table A2. Time trends of citrus consumption during the follow-up.**

| Median consumption (serving/d)              | 1984 | 1986 | 1990 | 1994 | 1998 | 2002 | 2006 |
|---------------------------------------------|------|------|------|------|------|------|------|
| <b>Nurses' Health Study</b>                 |      |      |      |      |      |      |      |
| Overall citrus                              | 0.78 | 0.78 | 0.76 | 0.76 | 0.78 | 0.74 | 0.70 |
| Grapefruit                                  | 0.07 | 0.07 | 0.07 | 0.07 | 0.07 | --   | --   |
| Grapefruit juice                            | 0    | 0    | 0    | 0.02 | 0.01 | --   | --   |
| Grapefruit and grapefruit juice (combined)  | 0.07 | 0.10 | 0.09 | 0.10 | 0.11 | 0.10 | 0.09 |
| Oranges                                     | 0.07 | 0.10 | 0.12 | 0.12 | 0.14 | 0.13 | 0.13 |
| Orange juice                                | 0.43 | 0.29 | 0.31 | 0.33 | 0.34 | 0.34 | 0.33 |
| <b>Health Professionals Follow-up Study</b> |      |      |      |      |      |      |      |
| Overall citrus                              |      | 0.86 | 0.81 | 0.81 | 0.83 | 0.78 | 0.73 |
| Grapefruit                                  |      | 0.07 | 0.07 | 0.07 | 0.07 | --   | --   |
| Grapefruit juice                            |      | 0    | 0    | 0    | 0    | --   | --   |
| Grapefruit and grapefruit juice (combined)  |      | 0.07 | 0.10 | 0.10 | 0.10 | 0.10 | 0.08 |
| Oranges                                     |      | 0.07 | 0.10 | 0.14 | 0.14 | 0.14 | 0.14 |
| Orange juice                                |      | 0.43 | 0.29 | 0.31 | 0.34 | 0.34 | 0.32 |

**Table A3. Pearson correlation matrix between intakes of citrus products and vitamin C during the follow-up.**

| <b>Women</b>                               | Total citrus | Grapefruit | Grapefruit juice | Grapefruit and grapefruit juice (combined) | Oranges | Orange juice | Total vitamin C | Vitamin C from diet | Vitamin C from supplement |
|--------------------------------------------|--------------|------------|------------------|--------------------------------------------|---------|--------------|-----------------|---------------------|---------------------------|
| Overall citrus                             | 1.00         |            |                  |                                            |         |              |                 |                     |                           |
| Grapefruit                                 | 0.47         | 1.00       |                  |                                            |         |              |                 |                     |                           |
| Grapefruit juice                           | 0.39         | 0.17       | 1.00             |                                            |         |              |                 |                     |                           |
| Grapefruit and grapefruit juice (combined) | 0.56         | 0.74       | 0.78             | 1.00                                       |         |              |                 |                     |                           |
| Oranges                                    | 0.49         | 0.27       | 0.03             | 0.20                                       | 1.00    |              |                 |                     |                           |
| Orange juice                               | 0.77         | 0.04       | 0.03             | 0.04                                       | 0.04    | 1.00         |                 |                     |                           |
| Total vitamin C                            | 0.19         | 0.13       | 0.09             | 0.15                                       | 0.14    | 0.10         | 1.00            |                     |                           |
| Vitamin C from diet                        | 0.75         | 0.36       | 0.26             | 0.40                                       | 0.46    | 0.54         | 0.27            | 1.00                |                           |
| Vitamin C from supplement                  | 0.04         | 0.06       | 0.04             | 0.07                                       | 0.05    | -0.01        | 0.98            | 0.07                | 1.00                      |

  

| <b>Men</b>                                 | Total citrus | Grapefruit | Grapefruit juice | Grapefruit and grapefruit juice (combined) | Oranges | Orange juice | Total vitamin C | Vitamin C from diet | Vitamin C from supplement |
|--------------------------------------------|--------------|------------|------------------|--------------------------------------------|---------|--------------|-----------------|---------------------|---------------------------|
| Overall citrus                             | 1.00         |            |                  |                                            |         |              |                 |                     |                           |
| Grapefruit                                 | 0.47         | 1.00       |                  |                                            |         |              |                 |                     |                           |
| Grapefruit juice                           | 0.35         | 0.14       | 1.00             |                                            |         |              |                 |                     |                           |
| Grapefruit and grapefruit juice (combined) | 0.55         | 0.77       | 0.72             | 1.00                                       |         |              |                 |                     |                           |
| Oranges                                    | 0.54         | 0.24       | 0.03             | 0.19                                       | 1.00    |              |                 |                     |                           |
| Orange juice                               | 0.75         | 0.03       | 0.03             | 0.04                                       | 0.07    | 1.00         |                 |                     |                           |
| Total vitamin C                            | 0.21         | 0.11       | 0.09             | 0.13                                       | 0.14    | 0.13         | 1.00            |                     |                           |
| Vitamin C from diet                        | 0.80         | 0.34       | 0.24             | 0.39                                       | 0.50    | 0.59         | 0.27            | 1.00                |                           |
| Vitamin C from supplement                  | 0.05         | 0.05       | 0.04             | 0.06                                       | 0.05    | 0.01         | 0.98            | 0.08                | 1.00                      |



**Table A4. Hazard ratios for incident melanoma according to frequency of citrus consumption among women and men separately.**

|                                                   | Serving category |                  |                  |                  | P for trend |
|---------------------------------------------------|------------------|------------------|------------------|------------------|-------------|
| <b>Women</b>                                      |                  |                  |                  |                  |             |
| <b>Overall citrus</b>                             | <2/wk            | 2-4/wk           | 5-6/wk           | ≥1/d             |             |
| No. of person-years                               | 258,988          | 250,413          | 312,769          | 468,784          |             |
| No. of cases                                      | 142              | 175              | 296              | 410              |             |
| Age-adjusted hazard ratio (95% CI)                | 1.00             | 1.12 (0.90-1.40) | 1.47 (1.20-1.79) | 1.48 (1.22-1.79) | <0.001      |
| Multivariable-adjusted hazard ratio (95% CI)*     | 1.00             | 1.05 (0.84-1.31) | 1.32 (1.08-1.63) | 1.32 (1.08-1.62) | 0.001       |
| <b>Grapefruit</b>                                 | Never            | <1/wk            | 1/wk             | ≥2/wk            |             |
| No. of person-years                               | 310,721          | 422,545          | 242,981          | 314,707          |             |
| No. of cases                                      | 155              | 331              | 205              | 332              |             |
| Age-adjusted hazard ratio (95% CI)                | 1.00             | 1.32 (1.09-1.60) | 1.45 (1.17-1.79) | 1.69 (1.39-2.05) | <0.001      |
| Multivariable-adjusted hazard ratio (95% CI)*     | 1.00             | 1.21 (1.00-1.47) | 1.29 (1.04-1.60) | 1.44 (1.18-1.76) | <0.001      |
| Multivariable-adjusted hazard ratio (95% CI)†     | 1.00             | 1.19 (0.98-1.46) | 1.26 (1.01-1.58) | 1.43 (1.15-1.77) | 0.002       |
| <b>Grapefruit juice</b>                           | Never            | <1/wk            | 1/wk             | ≥2/wk            |             |
| No. of person-years                               | 693,859          | 316,307          | 113,348          | 167,440          |             |
| No. of cases                                      | 475              | 296              | 102              | 150              |             |
| Age-adjusted hazard ratio (95% CI)                | 1.00             | 1.16 (1.00-1.35) | 1.14 (0.92-1.41) | 1.14 (0.95-1.38) | 0.12        |
| Multivariable-adjusted hazard ratio (95% CI)*     | 1.00             | 1.08 (0.93-1.26) | 1.06 (0.85-1.31) | 1.05 (0.87-1.26) | 0.61        |
| Multivariable-adjusted hazard ratio (95% CI)†     | 1.00             | 1.01 (0.87-1.18) | 0.97 (0.77-1.21) | 0.96 (0.79-1.16) | 0.58        |
| <b>Grapefruit and grapefruit juice (combined)</b> | Never            | <1/wk            | 1/wk             | ≥2/wk            |             |
| No. of person-years                               | 256,197          | 320,986          | 235,486          | 478,285          |             |
| No. of cases                                      | 114              | 257              | 192              | 460              |             |
| Age-adjusted hazard ratio (95% CI)                | 1.00             | 1.45 (1.16-1.81) | 1.51 (1.20-1.91) | 1.74 (1.41-2.14) | <0.001      |
| Multivariable-adjusted hazard ratio (95% CI)*     | 1.00             | 1.34 (1.07-1.67) | 1.36 (1.07-1.72) | 1.48 (1.20-1.83) | 0.002       |
| Multivariable-adjusted hazard ratio (95% CI)†     | 1.00             | 1.31 (1.05-1.65) | 1.32 (1.04-1.68) | 1.44 (1.16-1.80) | 0.006       |
| <b>Oranges</b>                                    | Never            | ≤1/wk            | 2/wk             | ≥3/wk            |             |
| No. of person-years                               | 140,973          | 613,659          | 236,782          | 299,540          |             |
| No. of cases                                      | 69               | 455              | 241              | 258              |             |

|                                                   |         |                  |                  |                  |        |
|---------------------------------------------------|---------|------------------|------------------|------------------|--------|
| Age-adjusted hazard ratio (95% CI)                | 1.00    | 1.23 (0.95-1.58) | 1.43 (1.09-1.87) | 1.37 (1.05-1.80) | 0.009  |
| Multivariable-adjusted hazard ratio (95% CI)*     | 1.00    | 1.11 (0.86-1.44) | 1.23 (0.93-1.62) | 1.18 (0.90-1.56) | 0.16   |
| Multivariable-adjusted hazard ratio (95% CI)†     | 1.00    | 1.04 (0.80-1.35) | 1.12 (0.84-1.49) | 1.07 (0.81-1.42) | 0.44   |
| <b>Orange juice</b>                               | <1/wk   | 1-2/wk           | 3-4/wk           | ≥5/wk            |        |
| No. of person-years                               | 317,865 | 300,667          | 261,691          | 410,731          |        |
| No. of cases                                      | 200     | 242              | 194              | 387              |        |
| Age-adjusted hazard ratio (95% CI)                | 1.00    | 1.11 (0.92-1.34) | 1.01 (0.83-1.23) | 1.34 (1.13-1.59) | 0.002  |
| Multivariable-adjusted hazard ratio (95% CI)*     | 1.00    | 1.07 (0.89-1.30) | 0.98 (0.80-1.20) | 1.27 (1.06-1.52) | 0.02   |
| Multivariable-adjusted hazard ratio (95% CI)†     | 1.00    | 1.03 (0.85-1.25) | 0.94 (0.77-1.15) | 1.23 (1.02-1.47) | 0.04   |
| <b>Men</b>                                        |         |                  |                  |                  |        |
| <b>Overall citrus</b>                             | <2/wk   | 2-4/wk           | 5-6/wk           | ≥1/d             |        |
| No. of person-years                               | 145,862 | 126,063          | 158,878          | 280,677          |        |
| No. of cases                                      | 118     | 148              | 200              | 351              |        |
| Age-adjusted hazard ratio (95% CI)                | 1.00    | 1.27 (1.00-1.62) | 1.29 (1.03-1.62) | 1.36 (1.10-1.68) | 0.008  |
| Multivariable-adjusted hazard ratio (95% CI)*     | 1.00    | 1.18 (0.92-1.50) | 1.18 (0.93-1.49) | 1.28 (1.03-1.59) | 0.04   |
| <b>Grapefruit</b>                                 | Never   | <1/wk            | 1/wk             | ≥2/wk            |        |
| No. of person-years                               | 204,442 | 224,478          | 111,751          | 170,807          |        |
| No. of cases                                      | 162     | 258              | 148              | 249              |        |
| Age-adjusted hazard ratio (95% CI)                | 1.00    | 1.28 (1.05-1.56) | 1.46 (1.17-1.83) | 1.44 (1.18-1.76) | <0.001 |
| Multivariable-adjusted hazard ratio (95% CI)*     | 1.00    | 1.15 (0.95-1.41) | 1.34 (1.06-1.68) | 1.29 (1.05-1.59) | 0.009  |
| Multivariable-adjusted hazard ratio (95% CI)†     | 1.00    | 1.16 (0.94-1.42) | 1.35 (1.06-1.71) | 1.30 (1.04-1.63) | 0.01   |
| <b>Grapefruit juice</b>                           | Never   | <1/wk            | 1/wk             | ≥2/wk            |        |
| No. of person-years                               | 413,283 | 166,236          | 54,365           | 77,595           |        |
| No. of cases                                      | 434     | 212              | 70               | 101              |        |
| Age-adjusted hazard ratio (95% CI)                | 1.00    | 1.06 (0.90-1.26) | 1.11 (0.86-1.43) | 1.10 (0.88-1.37) | 0.29   |
| Multivariable-adjusted hazard ratio (95% CI)*     | 1.00    | 1.00 (0.84-1.18) | 1.08 (0.84-1.39) | 1.11 (0.89-1.38) | 0.30   |
| Multivariable-adjusted hazard ratio (95% CI)†     | 1.00    | 0.94 (0.79-1.11) | 0.98 (0.76-1.28) | 1.03 (0.82-1.28) | 0.86   |
| <b>Grapefruit and grapefruit juice (combined)</b> | Never   | <1/wk            | 1/wk             | ≥2/wk            |        |

|                                               |         |                  |                  |                  |       |
|-----------------------------------------------|---------|------------------|------------------|------------------|-------|
| No. of person-years                           | 171,468 | 165,559          | 121,501          | 252,951          |       |
| No. of cases                                  | 132     | 189              | 153              | 343              |       |
| Age-adjusted hazard ratio (95% CI)            | 1.00    | 1.24 (0.99-1.55) | 1.39 (1.10-1.76) | 1.40 (1.15-1.72) | 0.001 |
| Multivariable-adjusted hazard ratio (95% CI)* | 1.00    | 1.10 (0.88-1.38) | 1.24 (0.98-1.58) | 1.26 (1.02-1.55) | 0.02  |
| Multivariable-adjusted hazard ratio (95% CI)† | 1.00    | 1.08 (0.86-1.36) | 1.22 (0.96-1.56) | 1.24 (1.00-1.54) | 0.03  |
| <b>Oranges</b>                                | Never   | ≤1/wk            | 2/wk             | ≥3/wk            |       |
| No. of person-years                           | 90,659  | 318,142          | 106,903          | 195,775          |       |
| No. of cases                                  | 69      | 373              | 131              | 244              |       |
| Age-adjusted hazard ratio (95% CI)            | 1.00    | 1.30 (1.00-1.69) | 1.07 (0.80-1.45) | 1.30 (0.99-1.69) | 0.67  |
| Multivariable-adjusted hazard ratio (95% CI)* | 1.00    | 1.16 (0.89-1.50) | 0.90 (0.66-1.22) | 1.16 (0.88-1.52) | 0.85  |
| Multivariable-adjusted hazard ratio (95% CI)† | 1.00    | 1.09 (0.84-1.43) | 0.83 (0.61-1.13) | 1.05 (0.79-1.40) | 0.40  |
| <b>Orange juice</b>                           | <1/wk   | 1-2/wk           | 3-4/wk           | ≥5/wk            |       |
| No. of person-years                           | 187,642 | 156,182          | 139,405          | 228,249          |       |
| No. of cases                                  | 159     | 192              | 171              | 295              |       |
| Age-adjusted hazard ratio (95% CI)            | 1.00    | 1.24 (1.00-1.53) | 1.28 (1.03-1.59) | 1.34 (1.10-1.63) | 0.006 |
| Multivariable-adjusted hazard ratio (95% CI)* | 1.00    | 1.16 (0.93-1.43) | 1.21 (0.97-1.51) | 1.28 (1.05-1.56) | 0.02  |
| Multivariable-adjusted hazard ratio (95% CI)† | 1.00    | 1.13 (0.91-1.41) | 1.18 (0.94-1.47) | 1.25 (1.02-1.53) | 0.04  |

\* Multivariable analyses were further adjusted for family history of melanoma (yes vs. no), natural hair color (red, blonde, light brown, dark brown, black, or missing), number of arm moles (0, 1-2, 3-9, ≥10, or missing), sunburn susceptibility as a child/adolescent (none/some redness, burn, painful burn/blisters, or missing), number of lifetime blistering sunburns (0, 1-4, 5-9, ≥10, or missing), cumulative UV flux since baseline (quintiles or missing), average time spent in direct sunlight since high school (<2, 2-5, 6-9, ≥10 hrs/wk, or missing), body mass index (<25.0, 25.0-29.9, 30.0-34.9, ≥35.0 kg/m<sup>2</sup>), physical activity (quintiles, or missing), smoking status (never, past, current with 1-14, 15-24, or ≥25 cigarettes/d, or missing), intakes of total energy (quintiles or missing), alcohol (0, 0.1-4.9, 5.0-9.9, 10.0-19.9, ≥20.0 g/d, or missing), coffee (0, <1, 1-2, ≥3 cup/d, or missing) and vitamin C from supplement (0, 1-99, 100-299, 300-599, ≥600 mg/d, or missing). Analyses for women were also adjusted for menopausal status and postmenopausal hormone use (premenopausal, postmenopausal never, past, or current use, or missing). CI denotes confidence interval.

† Multivariable analyses were additionally adjusted for consumption of the other individual citrus products listed in the table. Multivariable analyses for the combined grapefruit and grapefruit juice were additionally adjusted for consumption of oranges and orange juice.

**Table A5. Sensitivity analyses for the association between citrus consumption and risk of incident melanoma.**

|                                                   | Serving category                              |                  |                  |                  |                  | P for trend |
|---------------------------------------------------|-----------------------------------------------|------------------|------------------|------------------|------------------|-------------|
|                                                   | Adjusting for statin use (yes vs. no)         |                  |                  |                  |                  |             |
| <b>Overall citrus</b>                             | <2/wk                                         | 2-4/wk           | 5-6/wk           | 1-1.5/d          | ≥1.6/d           |             |
| No. of cases/person-years                         | 260/404,850                                   | 323/376,476      | 496/471,647      | 488/491,559      | 273/257,901      |             |
| Multivariable-adjusted hazard ratio (95% CI)*     | 1.00                                          | 1.10 (0.93-1.30) | 1.26 (1.08-1.47) | 1.27 (1.09-1.49) | 1.37 (1.14-1.64) | <0.001      |
| <b>Grapefruit</b>                                 | Never                                         | <1/wk            | 1/wk             | 2/wk             | ≥3/wk            |             |
| No. of cases/person-years                         | 317/515,163                                   | 589/647,023      | 353/354,732      | 275/224,690      | 306/260,825      |             |
| Multivariable-adjusted hazard ratio (95% CI)†     | 1.00                                          | 1.17 (1.01-1.35) | 1.30 (1.10-1.53) | 1.32 (1.11-1.58) | 1.42 (1.10-1.83) | <0.001      |
| <b>Grapefruit juice</b>                           | Never                                         | <1/wk            | 1/wk             | 2/wk             | ≥3/wk            |             |
| No. of cases/person-years                         | 909/1,107,142                                 | 508/482,543      | 172/167,713      | 126/111,640      | 125/133,396      |             |
| Multivariable-adjusted hazard ratio (95% CI)†     | 1.00                                          | 0.98 (0.87-1.10) | 0.97 (0.82-1.15) | 0.98 (0.81-1.20) | 0.98 (0.81-1.19) | 0.80        |
| <b>Grapefruit and grapefruit juice (combined)</b> | Never                                         | <1/wk            | 1/wk             | 2/wk             | ≥3/wk            |             |
| No. of cases/person-years                         | 246/427,665                                   | 446/486,545      | 345/356,987      | 357/303,786      | 446/427,450      |             |
| Multivariable-adjusted hazard ratio (95% CI)†     | 1.00                                          | 1.19 (0.98-1.43) | 1.27 (1.07-1.51) | 1.37 (1.15-1.63) | 1.32 (1.02-1.70) | 0.002       |
| <b>Oranges</b>                                    | Never                                         | ≤1/wk            | 2/wk             | 3/wk             | ≥4/wk            |             |
| No. of cases/person-years                         | 138/231,632                                   | 828/931,801      | 372/343,685      | 261/271,097      | 241/224,218      |             |
| Multivariable-adjusted hazard ratio (95% CI)†     | 1.00                                          | 1.06 (0.88-1.28) | 0.96 (0.70-1.32) | 1.01 (0.82-1.26) | 1.06 (0.85-1.32) | 0.83        |
| <b>Orange juice</b>                               | <1/wk                                         | 1-2/wk           | 3-4/wk           | 5-6/wk           | ≥1/d             |             |
| No. of cases/person-years                         | 359/505,507                                   | 434/456,849      | 365/401,096      | 377/314,923      | 305/324,057      |             |
| Multivariable-adjusted hazard ratio (95% CI)†     | 1.00                                          | 1.07 (0.93-1.23) | 1.04 (0.84-1.30) | 1.22 (1.05-1.41) | 1.26 (1.07-1.47) | <0.001      |
|                                                   | Adjusting for antiarrhythmic use (yes vs. no) |                  |                  |                  |                  |             |

|                                                   |               |                  |                  |                  |                  |        |
|---------------------------------------------------|---------------|------------------|------------------|------------------|------------------|--------|
| <b>Overall citrus</b>                             | <2/wk         | 2-4/wk           | 5-6/wk           | 1-1.5/d          | ≥1.6/d           |        |
| No. of cases/person-years                         | 260/404,850   | 323/376,476      | 496/471,647      | 488/491,559      | 273/257,901      |        |
| Multivariable-adjusted hazard ratio (95% CI)*     | 1.00          | 1.10 (0.93-1.30) | 1.26 (1.08-1.47) | 1.27 (1.09-1.49) | 1.37 (1.14-1.63) | <0.001 |
| <b>Grapefruit</b>                                 | Never         | <1/wk            | 1/wk             | 2/wk             | ≥3/wk            |        |
| No. of cases/person-years                         | 317/515,163   | 589/647,023      | 353/354,732      | 275/224,690      | 306/260,825      |        |
| Multivariable-adjusted hazard ratio (95% CI)†     | 1.00          | 1.17 (1.01-1.35) | 1.30 (1.10-1.53) | 1.32 (1.11-1.58) | 1.42 (1.09-1.83) | <0.001 |
| <b>Grapefruit juice</b>                           | Never         | <1/wk            | 1/wk             | 2/wk             | ≥3/wk            |        |
| No. of cases/person-years                         | 909/1,107,142 | 508/482,543      | 172/167,713      | 126/111,640      | 125/133,396      |        |
| Multivariable-adjusted hazard ratio (95% CI)†     | 1.00          | 0.98 (0.87-1.10) | 0.97 (0.82-1.15) | 0.98 (0.81-1.19) | 0.98 (0.81-1.19) | 0.80   |
| <b>Grapefruit and grapefruit juice (combined)</b> | Never         | <1/wk            | 1/wk             | 2/wk             | ≥3/wk            |        |
| No. of cases/person-years                         | 246/427,665   | 446/486,545      | 345/356,987      | 357/303,786      | 446/427,450      |        |
| Multivariable-adjusted hazard ratio (95% CI)†     | 1.00          | 1.19 (0.98-1.44) | 1.27 (1.07-1.51) | 1.37 (1.15-1.63) | 1.32 (1.02-1.70) | 0.002  |
| <b>Oranges</b>                                    | Never         | ≤1/wk            | 2/wk             | 3/wk             | ≥4/wk            |        |
| No. of cases/person-years                         | 138/231,632   | 828/931,801      | 372/343,685      | 261/271,097      | 241/224,218      |        |
| Multivariable-adjusted hazard ratio (95% CI)†     | 1.00          | 1.06 (0.88-1.28) | 0.96 (0.70-1.31) | 1.05 (0.84-1.30) | 1.07 (0.86-1.34) | 0.83   |
| <b>Orange juice</b>                               | <1/wk         | 1-2/wk           | 3-4/wk           | 5-6/wk           | ≥1/d             |        |
| No. of cases/person-years                         | 359/505,507   | 434/456,849      | 365/401,096      | 377/314,923      | 305/324,057      |        |
| Multivariable-adjusted hazard ratio (95% CI)†     | 1.00          | 1.07 (0.93-1.23) | 1.04 (0.83-1.30) | 1.21 (1.04-1.41) | 1.25 (1.07-1.47) | <0.001 |

---

**Adjusting for total vitamin C intake (quintiles)**

|                           |             |             |             |             |             |
|---------------------------|-------------|-------------|-------------|-------------|-------------|
| <b>Overall citrus</b>     | <2/wk       | 2-4/wk      | 5-6/wk      | 1-1.5/d     | ≥1.6/d      |
| No. of cases/person-years | 260/404,850 | 323/376,476 | 496/471,647 | 488/491,559 | 273/257,901 |

|                                                                      |               |                  |                  |                  |                  |        |
|----------------------------------------------------------------------|---------------|------------------|------------------|------------------|------------------|--------|
| Multivariable-adjusted hazard ratio (95% CI)*                        | 1.00          | 1.10 (0.93-1.30) | 1.25 (1.07-1.47) | 1.27 (1.08-1.50) | 1.35 (1.12-1.63) | <0.001 |
| <b>Grapefruit</b>                                                    | Never         | <1/wk            | 1/wk             | 2/wk             | ≥3/wk            |        |
| No. of cases/person-years                                            | 317/515,163   | 589/647,023      | 353/354,732      | 275/224,690      | 306/260,825      |        |
| Multivariable-adjusted hazard ratio (95% CI)†                        | 1.00          | 1.17 (1.02-1.36) | 1.30 (1.10-1.53) | 1.33 (1.11-1.59) | 1.42 (1.12-1.80) | <0.001 |
| <b>Grapefruit juice</b>                                              | Never         | <1/wk            | 1/wk             | 2/wk             | ≥3/wk            |        |
| No. of cases/person-years                                            | 909/1,107,142 | 508/482,543      | 172/167,713      | 126/111,640      | 125/133,396      |        |
| Multivariable-adjusted hazard ratio (95% CI)†                        | 1.00          | 0.98 (0.87-1.10) | 0.97 (0.82-1.15) | 0.99 (0.81-1.20) | 0.98 (0.81-1.19) | 0.79   |
| <b>Grapefruit and grapefruit juice (combined)</b>                    | Never         | <1/wk            | 1/wk             | 2/wk             | ≥3/wk            |        |
| No. of cases/person-years                                            | 246/427,665   | 446/486,545      | 345/356,987      | 357/303,786      | 446/427,450      |        |
| Multivariable-adjusted hazard ratio (95% CI)†                        | 1.00          | 1.19 (1.00-1.43) | 1.27 (1.07-1.51) | 1.38 (1.16-1.64) | 1.32 (1.04-1.67) | 0.002  |
| <b>Oranges</b>                                                       | Never         | ≤1/wk            | 2/wk             | 3/wk             | ≥4/wk            |        |
| No. of cases/person-years                                            | 138/231,632   | 828/931,801      | 372/343,685      | 261/271,097      | 241/224,218      |        |
| Multivariable-adjusted hazard ratio (95% CI)†                        | 1.00          | 1.06 (0.88-1.28) | 0.97 (0.72-1.31) | 1.05 (0.85-1.31) | 1.08 (0.86-1.35) | 0.82   |
| <b>Orange juice</b>                                                  | <1/wk         | 1-2/wk           | 3-4/wk           | 5-6/wk           | ≥1/d             |        |
| No. of cases/person-years                                            | 359/505,507   | 434/456,849      | 365/401,096      | 377/314,923      | 305/324,057      |        |
| Multivariable-adjusted hazard ratio (95% CI)†                        | 1.00          | 1.07 (0.93-1.24) | 1.04 (0.83-1.31) | 1.22 (1.04-1.42) | 1.25 (1.06-1.47) | 0.002  |
| <b>Adjusting for Alternate Healthy Eating Index-2010 (quintiles)</b> |               |                  |                  |                  |                  |        |
| <b>Overall citrus</b>                                                | <2/wk         | 2-4/wk           | 5-6/wk           | 1-1.5/d          | ≥1.6/d           |        |
| No. of cases/person-years                                            | 260/404,850   | 323/376,476      | 496/471,647      | 488/491,559      | 273/257,901      |        |
| Multivariable-adjusted hazard ratio (95% CI)*                        | 1.00          | 1.08 (0.91-1.27) | 1.21 (1.04-1.42) | 1.22 (1.04-1.43) | 1.29 (1.07-1.54) | 0.002  |

|                                                   |               |                  |                  |                  |                  |        |
|---------------------------------------------------|---------------|------------------|------------------|------------------|------------------|--------|
| <b>Grapefruit</b>                                 | Never         | <1/wk            | 1/wk             | 2/wk             | ≥3/wk            |        |
| No. of cases/person-years                         | 317/515,163   | 589/647,023      | 353/354,732      | 275/224,690      | 306/260,825      |        |
| Multivariable-adjusted hazard ratio (95% CI)†     | 1.00          | 1.15 (1.00-1.33) | 1.26 (1.07-1.49) | 1.27 (1.06-1.52) | 1.35 (1.10-1.66) | 0.002  |
| <b>Grapefruit juice</b>                           | Never         | <1/wk            | 1/wk             | 2/wk             | ≥3/wk            |        |
| No. of cases/person-years                         | 909/1,107,142 | 508/482,543      | 172/167,713      | 126/111,640      | 125/133,396      |        |
| Multivariable-adjusted hazard ratio (95% CI)†     | 1.00          | 0.97 (0.86-1.09) | 0.96 (0.81-1.14) | 0.97 (0.80-1.18) | 0.96 (0.79-1.16) | 0.63   |
| <b>Grapefruit and grapefruit juice (combined)</b> | Never         | <1/wk            | 1/wk             | 2/wk             | ≥3/wk            |        |
| No. of cases/person-years                         | 246/427,665   | 446/486,545      | 345/356,987      | 357/303,786      | 446/427,450      |        |
| Multivariable-adjusted hazard ratio (95% CI)†     | 1.00          | 1.17 (0.98-1.40) | 1.23 (1.04-1.46) | 1.32 (1.11-1.57) | 1.25 (1.01-1.55) | 0.02   |
| <b>Oranges</b>                                    | Never         | ≤1/wk            | 2/wk             | 3/wk             | ≥4/wk            |        |
| No. of cases/person-years                         | 138/231,632   | 828/931,801      | 372/343,685      | 261/271,097      | 241/224,218      |        |
| Multivariable-adjusted hazard ratio (95% CI)†     | 1.00          | 1.04 (0.87-1.26) | 0.93 (0.71-1.22) | 1.00 (0.80-1.24) | 1.01 (0.81-1.26) | 0.57   |
| <b>Orange juice</b>                               | <1/wk         | 1-2/wk           | 3-4/wk           | 5-6/wk           | ≥1/d             |        |
| No. of cases/person-years                         | 359/505,507   | 434/456,849      | 365/401,096      | 377/314,923      | 305/324,057      |        |
| Multivariable-adjusted hazard ratio (95% CI)†     | 1.00          | 1.08 (0.93-1.24) | 1.05 (0.86-1.29) | 1.23 (1.06-1.43) | 1.26 (1.07-1.47) | <0.001 |
| <b>Adjusting for sunscreen use ( yes vs. no)</b>  |               |                  |                  |                  |                  |        |
| <b>Overall citrus</b>                             | <2/wk         | 2-4/wk           | 5-6/wk           | 1-1.5/d          | ≥1.6/d           |        |
| No. of cases/person-years                         | 260/404,850   | 323/376,476      | 496/471,647      | 488/491,559      | 273/257,901      |        |
| Multivariable-adjusted hazard ratio (95% CI)*     | 1.00          | 1.10 (0.93-1.29) | 1.24 (1.06-1.45) | 1.25 (1.07-1.46) | 1.33 (1.11-1.59) | <0.001 |
| <b>Grapefruit</b>                                 | Never         | <1/wk            | 1/wk             | 2/wk             | ≥3/wk            |        |
| No. of cases/person-years                         | 317/515,163   | 589/647,023      | 353/354,732      | 275/224,690      | 306/260,825      |        |
| Multivariable-adjusted hazard ratio (95% CI)*     | 1.00          | 1.17 (1.01-1.35) | 1.29 (1.09-1.52) | 1.31 (1.09-1.57) | 1.39 (1.07-1.81) | 0.001  |

hazard ratio (95% CI)†

|                                                     |               |                  |                  |                  |                  |        |
|-----------------------------------------------------|---------------|------------------|------------------|------------------|------------------|--------|
| <b>Grapefruit juice</b>                             | Never         | <1/wk            | 1/wk             | 2/wk             | ≥3/wk            |        |
| No. of cases/person-years                           | 909/1,107,142 | 508/482,543      | 172/167,713      | 126/111,640      | 125/133,396      |        |
| Multivariable-adjusted hazard ratio (95% CI)†       | 1.00          | 0.98 (0.87-1.09) | 0.97 (0.82-1.15) | 0.98 (0.81-1.19) | 0.97 (0.80-1.18) | 0.71   |
| <b>Grapefruit and grapefruit juice (combined)</b>   | Never         | <1/wk            | 1/wk             | 2/wk             | ≥3/wk            |        |
| No. of cases/person-years                           | 246/427,665   | 446/486,545      | 345/356,987      | 357/303,786      | 446/427,450      |        |
| Multivariable-adjusted hazard ratio (95% CI)†       | 1.00          | 1.19 (0.98-1.43) | 1.26 (1.06-1.49) | 1.36 (1.14-1.61) | 1.30 (1.00-1.68) | 0.004  |
| <b>Oranges</b>                                      | Never         | ≤1/wk            | 2/wk             | 3/wk             | ≥4/wk            |        |
| No. of cases/person-years                           | 138/231,632   | 828/931,801      | 372/343,685      | 261/271,097      | 241/224,218      |        |
| Multivariable-adjusted hazard ratio (95% CI)†       | 1.00          | 1.06 (0.88-1.28) | 0.96 (0.71-1.29) | 1.04 (0.84-1.29) | 1.07 (0.85-1.33) | 0.94   |
| <b>Orange juice</b>                                 | <1/wk         | 1-2/wk           | 3-4/wk           | 5-6/wk           | ≥1/d             |        |
| No. of cases/person-years                           | 359/505,507   | 434/456,849      | 365/401,096      | 377/314,923      | 305/324,057      |        |
| Multivariable-adjusted hazard ratio (95% CI)†       | 1.00          | 1.07 (0.93-1.23) | 1.04 (0.83-1.29) | 1.21 (1.04-1.40) | 1.24 (1.06-1.45) | 0.002  |
| <b>Adjusting for propensity score (continuous)‡</b> |               |                  |                  |                  |                  |        |
| <b>Overall citrus</b>                               | <2/wk         | 2-4/wk           | 5-6/wk           | 1-1.5/d          | ≥1.6/d           |        |
| No. of cases/person-years                           | 260/404,850   | 323/376,476      | 496/471,647      | 488/491,559      | 273/257,901      |        |
| Multivariable-adjusted hazard ratio (95% CI)*       | 1.00          | 1.09 (0.93-1.29) | 1.24 (1.06-1.45) | 1.25 (1.07-1.46) | 1.34 (1.12-1.60) | <0.001 |
| <b>Grapefruit</b>                                   | Never         | <1/wk            | 1/wk             | 2/wk             | ≥3/wk            |        |
| No. of cases/person-years                           | 317/515,163   | 589/647,023      | 353/354,732      | 275/224,690      | 306/260,825      |        |
| Multivariable-adjusted hazard ratio (95% CI)†       | 1.00          | 1.17 (1.01-1.35) | 1.28 (1.09-1.51) | 1.31 (1.09-1.56) | 1.39 (1.10-1.76) | <0.001 |
| <b>Grapefruit juice</b>                             | Never         | <1/wk            | 1/wk             | 2/wk             | ≥3/wk            |        |



|                                                           |               |                  |                  |                  |                  |       |
|-----------------------------------------------------------|---------------|------------------|------------------|------------------|------------------|-------|
| No. of cases/person-years                                 | 909/1,107,142 | 508/482,543      | 172/167,713      | 126/111,640      | 125/133,396      |       |
| Multivariable-adjusted hazard ratio (95% CI) <sup>†</sup> | 1.00          | 0.98 (0.87-1.09) | 0.97 (0.82-1.15) | 0.98 (0.81-1.19) | 0.97 (0.80-1.17) | 0.71  |
| <b>Grapefruit and grapefruit juice (combined)</b>         | Never         | <1/wk            | 1/wk             | 2/wk             | ≥3/wk            |       |
| No. of cases/person-years                                 | 246/427,665   | 446/486,545      | 345/356,987      | 357/303,786      | 446/427,450      |       |
| Multivariable-adjusted hazard ratio (95% CI) <sup>†</sup> | 1.00          | 1.18 (0.99-1.41) | 1.25 (1.06-1.49) | 1.35 (1.14-1.61) | 1.29 (1.02-1.64) | 0.004 |
| <b>Oranges</b>                                            | Never         | ≤1/wk            | 2/wk             | 3/wk             | ≥4/wk            |       |
| No. of cases/person-years                                 | 138/231,632   | 828/931,801      | 372/343,685      | 261/271,097      | 241/224,218      |       |
| Multivariable-adjusted hazard ratio (95% CI) <sup>†</sup> | 1.00          | 1.05 (0.87-1.27) | 0.95 (0.71-1.28) | 1.03 (0.83-1.29) | 1.06 (0.85-1.32) | 0.97  |
| <b>Orange juice</b>                                       | <1/wk         | 1-2/wk           | 3-4/wk           | 5-6/wk           | ≥1/d             |       |
| No. of cases/person-years                                 | 359/505,507   | 434/456,849      | 365/401,096      | 377/314,923      | 305/324,057      |       |
| Multivariable-adjusted hazard ratio (95% CI) <sup>†</sup> | 1.00          | 1.07 (0.93-1.23) | 1.04 (0.83-1.30) | 1.21 (1.04-1.41) | 1.24 (1.06-1.46) | 0.001 |

\* Multivariable analyses were adjusted for age, family history of melanoma, natural hair color, number of arm moles, sunburn susceptibility as a child/adolescent, number of lifetime blistering sunburns, cumulative UV flux since baseline, average time spent in direct sunlight since high school, body mass index, physical activity, smoking status, intakes of total energy, alcohol, coffee and vitamin C from supplement. Vitamin C from supplement was not included in the models with adjustment for total vitamin C. Analyses for women were also adjusted for menopausal status and postmenopausal hormone use. For further details of these variables, see the Table A4 footnote. Results among women and men were pooled using the random-effects model. CI denotes confidence interval.

<sup>†</sup> Multivariable analyses were additionally adjusted for consumption of the other individual citrus products listed in the table. Multivariable analyses for the combined grapefruit and grapefruit juice were additionally adjusted for consumption of oranges and orange juice.

<sup>‡</sup> A propensity score was generated from a logistic model for each intake and adjusted in the multivariable analyses for that intake.

**Table A6. Lag analyses for the association between citrus consumption and risk of incident melanoma.**

|                                                            | Serving category |                  |                  |                  | P for trend |
|------------------------------------------------------------|------------------|------------------|------------------|------------------|-------------|
| <b>2-year lag (exclude the first 2 years of follow-up)</b> |                  |                  |                  |                  |             |
| <b>Overall citrus</b>                                      | <2/wk            | 2-4/wk           | 5-6/wk           | ≥1/d             |             |
| No. of cases/person-years                                  | 245/369,250      | 305/335,855      | 471/417,971      | 735/676,085      |             |
| Multivariable-adjusted hazard ratio (95% CI)*              | 1.00             | 1.15 (0.92-1.42) | 1.32 (1.12-1.54) | 1.35 (1.16-1.57) | <0.001      |
| <b>Grapefruit</b>                                          | Never            | <1/wk            | 1/wk             | ≥2/wk            |             |
| No. of cases/person-years                                  | 315/472,261      | 563/579,218      | 322/318,282      | 556/429,398      |             |
| Multivariable-adjusted hazard ratio (95% CI)†              | 1.00             | 1.17 (1.01-1.35) | 1.23 (1.04-1.45) | 1.37 (1.17-1.61) | <0.001      |
| <b>Grapefruit juice</b>                                    | Never            | <1/wk            | 1/wk             | ≥2/wk            |             |
| No. of cases/person-years                                  | 890/1,005,207    | 470/427,281      | 158/149,101      | 238/217,571      |             |
| Multivariable-adjusted hazard ratio (95% CI)†              | 1.00             | 0.95 (0.84-1.07) | 0.94 (0.79-1.12) | 0.97 (0.83-1.13) | 0.54        |
| <b>Grapefruit and grapefruit juice (combined)</b>          | Never            | <1/wk            | 1/wk             | ≥2/wk            |             |
| No. of cases/person-years                                  | 250/394,556      | 428/431,634      | 307/319,409      | 771/653,559      |             |
| Multivariable-adjusted hazard ratio (95% CI)†              | 1.00             | 1.19 (1.01-1.40) | 1.15 (0.97-1.37) | 1.30 (1.12-1.52) | 0.004       |
| <b>Oranges</b>                                             | Never            | ≤1/wk            | 2/wk             | ≥3/wk            |             |
| No. of cases/person-years                                  | 137/215,442      | 801/839,863      | 330/298,658      | 488/445,197      |             |
| Multivariable-adjusted hazard ratio (95% CI)†              | 1.00             | 1.10 (0.92-1.33) | 0.95 (0.65-1.39) | 1.11 (0.91-1.36) | 0.99        |
| <b>Orange juice</b>                                        | <1/wk            | 1-2/wk           | 3-4/wk           | ≥5/wk            |             |
| No. of cases/person-years                                  | 352/463,385      | 408/405,826      | 345/356,997      | 651/572,953      |             |
| Multivariable-adjusted hazard ratio (95% CI)†              | 1.00             | 1.09 (0.94-1.26) | 1.06 (0.91-1.24) | 1.26 (1.10-1.44) | 0.002       |
| <b>4-year lag (exclude the first 4 years of follow-up)</b> |                  |                  |                  |                  |             |

|                                                   |             |                  |                  |                  |        |
|---------------------------------------------------|-------------|------------------|------------------|------------------|--------|
| <b>Overall citrus</b>                             | <2/wk       | 2-4/wk           | 5-6/wk           | ≥1/d             |        |
| No. of cases/person-years                         | 241/331,635 | 283/295,032      | 449/365,323      | 700/602,383      |        |
| Multivariable-adjusted hazard ratio (95% CI)*     | 1.00        | 1.14 (0.88-1.47) | 1.34 (1.14-1.58) | 1.34 (1.15-1.56) | <0.001 |
| <b>Grapefruit</b>                                 | Never       | <1/wk            | 1/wk             | ≥2/wk            |        |
| No. of cases/person-years                         | 317/426,762 | 524/511,402      | 308/281,741      | 524/374,466      |        |
| Multivariable-adjusted hazard ratio (95% CI)†     | 1.00        | 1.11 (0.95-1.28) | 1.21 (1.02-1.44) | 1.36 (1.14-1.63) | <0.001 |
| <b>Grapefruit juice</b>                           | Never       | <1/wk            | 1/wk             | ≥2/wk            |        |
| No. of cases/person-years                         | 860/900,223 | 443/372,799      | 141/130,744      | 229/190,605      |        |
| Multivariable-adjusted hazard ratio (95% CI)†     | 1.00        | 0.97 (0.86-1.09) | 0.91 (0.75-1.09) | 1.01 (0.81-1.25) | 0.76   |
| <b>Grapefruit and grapefruit juice (combined)</b> | Never       | <1/wk            | 1/wk             | ≥2/wk            |        |
| No. of cases/person-years                         | 254/358,592 | 395/377,472      | 291/281,830      | 733/576,478      |        |
| Multivariable-adjusted hazard ratio (95% CI)†     | 1.00        | 1.15 (0.98-1.35) | 1.14 (0.93-1.38) | 1.29 (1.11-1.51) | 0.003  |
| <b>Oranges</b>                                    | Never       | ≤1/wk            | 2/wk             | ≥3/wk            |        |
| No. of cases/person-years                         | 133/197,179 | 787/746,609      | 302/255,641      | 451/394,942      |        |
| Multivariable-adjusted hazard ratio (95% CI)†     | 1.00        | 1.22 (1.01-1.47) | 1.04 (0.77-1.40) | 1.15 (0.93-1.41) | 0.73   |
| <b>Orange juice</b>                               | <1/wk       | 1-2/wk           | 3-4/wk           | ≥5/wk            |        |
| No. of cases/person-years                         | 361/418,332 | 360/355,562      | 336/313,054      | 616/507,423      |        |
| Multivariable-adjusted hazard ratio (95% CI)†     | 1.00        | 0.98 (0.85-1.14) | 1.07 (0.84-1.36) | 1.20 (1.05-1.38) | 0.002  |

---

**6-year lag (exclude the first 6 years of follow-up)**

|                                               |             |                  |                  |                  |        |
|-----------------------------------------------|-------------|------------------|------------------|------------------|--------|
| <b>Overall citrus</b>                         | <2/wk       | 2-4/wk           | 5-6/wk           | ≥1/d             |        |
| No. of cases/person-years                     | 243/295,986 | 258/257,431      | 405/315,905      | 672/530,748      |        |
| Multivariable-adjusted hazard ratio (95% CI)* | 1.00        | 1.06 (0.89-1.27) | 1.26 (1.07-1.48) | 1.30 (1.12-1.52) | <0.001 |

|                                                            |             |                  |                  |                  |        |
|------------------------------------------------------------|-------------|------------------|------------------|------------------|--------|
| <b>Grapefruit</b>                                          | Never       | <1/wk            | 1/wk             | ≥2/wk            |        |
| No. of cases/person-years                                  | 305/382,964 | 483/446,958      | 308/247,250      | 482/322,897      |        |
| Multivariable-adjusted hazard ratio (95% CI)†              | 1.00        | 1.11 (0.96-1.30) | 1.32 (1.11-1.58) | 1.40 (1.19-1.65) | <0.001 |
| <b>Grapefruit juice</b>                                    | Never       | <1/wk            | 1/wk             | ≥2/wk            |        |
| No. of cases/person-years                                  | 826/800,166 | 412/321,386      | 130/113,342      | 210/165,174      |        |
| Multivariable-adjusted hazard ratio (95% CI)†              | 1.00        | 0.97 (0.85-1.09) | 0.88 (0.73-1.07) | 0.99 (0.71-1.37) | 0.65   |
| <b>Grapefruit and grapefruit juice (combined)</b>          | Never       | <1/wk            | 1/wk             | ≥2/wk            |        |
| No. of cases/person-years                                  | 251/323,520 | 346/328,097      | 302/246,934      | 679/501,517      |        |
| Multivariable-adjusted hazard ratio (95% CI)†              | 1.00        | 1.09 (0.91-1.31) | 1.27 (1.07-1.52) | 1.29 (1.10-1.51) | <0.001 |
| <b>Oranges</b>                                             | Never       | ≤1/wk            | 2/wk             | ≥3/wk            |        |
| No. of cases/person-years                                  | 139/178,999 | 744/658,213      | 267/215,754      | 428/347,102      |        |
| Multivariable-adjusted hazard ratio (95% CI)†              | 1.00        | 1.15 (0.95-1.39) | 0.96 (0.76-1.21) | 1.10 (0.89-1.34) | 0.58   |
| <b>Orange juice</b>                                        | <1/wk       | 1-2/wk           | 3-4/wk           | ≥5/wk            |        |
| No. of cases/person-years                                  | 342/374,658 | 339/308,965      | 318/271,981      | 579/444,464      |        |
| Multivariable-adjusted hazard ratio (95% CI)†              | 1.00        | 1.03 (0.88-1.20) | 1.12 (0.95-1.31) | 1.24 (1.08-1.43) | <0.001 |
| <b>8-year lag (exclude the first 8 years of follow-up)</b> |             |                  |                  |                  |        |
| <b>Overall citrus</b>                                      | <2/wk       | 2-4/wk           | 5-6/wk           | ≥1/d             |        |
| No. of cases/person-years                                  | 238/262,202 | 238/221,913      | 367/269,093      | 636/462,143      |        |
| Multivariable-adjusted hazard ratio (95% CI)*              | 1.00        | 1.05 (0.87-1.25) | 1.24 (1.05-1.46) | 1.30 (1.11-1.52) | <0.001 |
| <b>Grapefruit</b>                                          | Never       | <1/wk            | 1/wk             | ≥2/wk            |        |
| No. of cases/person-years                                  | 296/341,367 | 452/385,513      | 290/214,457      | 441/274,013      |        |

|                                                              |             |                  |                  |                  |        |
|--------------------------------------------------------------|-------------|------------------|------------------|------------------|--------|
| Multivariable-adjusted hazard ratio (95% CI)†                | 1.00        | 1.11 (0.95-1.30) | 1.30 (1.09-1.56) | 1.37 (1.15-1.65) | <0.001 |
| <b>Grapefruit juice</b>                                      | Never       | <1/wk            | 1/wk             | ≥2/wk            |        |
| No. of cases/person-years                                    | 791/705,206 | 369/272,324      | 123/97,053       | 196/140,765      |        |
| Multivariable-adjusted hazard ratio (95% CI)†                | 1.00        | 0.96 (0.84-1.09) | 0.91 (0.75-1.11) | 1.01 (0.70-1.46) | 0.85   |
| <b>Grapefruit and grapefruit juice (combined)</b>            | Never       | <1/wk            | 1/wk             | ≥2/wk            |        |
| No. of cases/person-years                                    | 245/289,953 | 329/281,906      | 286/213,738      | 619/429,754      |        |
| Multivariable-adjusted hazard ratio (95% CI)†                | 1.00        | 1.12 (0.91-1.37) | 1.28 (1.07-1.53) | 1.26 (1.07-1.48) | 0.003  |
| <b>Oranges</b>                                               | Never       | ≤1/wk            | 2/wk             | ≥3/wk            |        |
| No. of cases/person-years                                    | 127/161,932 | 706/574,257      | 245/177,914      | 401/301,247      |        |
| Multivariable-adjusted hazard ratio (95% CI)†                | 1.00        | 1.29 (1.06-1.56) | 1.13 (0.90-1.42) | 1.23 (1.00-1.52) | 0.86   |
| <b>Orange juice</b>                                          | <1/wk       | 1-2/wk           | 3-4/wk           | ≥5/wk            |        |
| No. of cases/person-years                                    | 337/332,863 | 314/264,677      | 302/233,231      | 526/384,579      |        |
| Multivariable-adjusted hazard ratio (95% CI)†                | 1.00        | 1.02 (0.88-1.20) | 1.14 (0.97-1.34) | 1.20 (1.04-1.39) | 0.004  |
| <b>10-year lag (exclude the first 10 years of follow-up)</b> |             |                  |                  |                  |        |
| <b>Overall citrus</b>                                        | <2/wk       | 2-4/wk           | 5-6/wk           | ≥1/d             |        |
| No. of cases/person-years                                    | 231/228,630 | 228/188,325      | 335/225,224      | 566/393,022      |        |
| Multivariable-adjusted hazard ratio (95% CI)*                | 1.00        | 1.08 (0.90-1.30) | 1.23 (1.02-1.48) | 1.25 (1.06-1.46) | 0.003  |
| <b>Grapefruit</b>                                            | Never       | <1/wk            | 1/wk             | ≥2/wk            |        |
| No. of cases/person-years                                    | 290/299,911 | 424/325,401      | 248/182,451      | 398/227,439      |        |
| Multivariable-adjusted hazard ratio (95% CI)†                | 1.00        | 1.15 (0.98-1.35) | 1.22 (1.02-1.47) | 1.42 (1.19-1.68) | <0.001 |
| <b>Grapefruit juice</b>                                      | Never       | <1/wk            | 1/wk             | ≥2/wk            |        |

|                                                              |             |                  |                  |                  |       |
|--------------------------------------------------------------|-------------|------------------|------------------|------------------|-------|
| No. of cases/person-years                                    | 754/611,472 | 332/225,014      | 98/81,277        | 176/117,438      |       |
| Multivariable-adjusted hazard ratio (95% CI)†                | 1.00        | 0.98 (0.86-1.13) | 0.82 (0.66-1.02) | 1.01 (0.74-1.46) | 0.63  |
| <b>Grapefruit and grapefruit juice (combined)</b>            | Never       | <1/wk            | 1/wk             | ≥2/wk            |       |
| No. of cases/person-years                                    | 246/255,617 | 306/238,270      | 252/181,925      | 556/359,390      |       |
| Multivariable-adjusted hazard ratio (95% CI)†                | 1.00        | 1.13 (0.95-1.34) | 1.21 (1.01-1.45) | 1.25 (1.06-1.46) | 0.01  |
| <b>Oranges</b>                                               | Never       | ≤1/wk            | 2/wk             | ≥3/wk            |       |
| No. of cases/person-years                                    | 133/143,746 | 647/493,172      | 229/143,586      | 351/254,698      |       |
| Multivariable-adjusted hazard ratio (95% CI)†                | 1.00        | 1.22 (0.94-1.59) | 1.20 (0.95-1.51) | 1.15 (0.93-1.42) | 0.80  |
| <b>Orange juice</b>                                          | <1/wk       | 1-2/wk           | 3-4/wk           | ≥5/wk            |       |
| No. of cases/person-years                                    | 333/290,022 | 283/222,904      | 279/196,328      | 465/325,949      |       |
| Multivariable-adjusted hazard ratio (95% CI)†                | 1.00        | 0.99 (0.84-1.17) | 1.14 (0.97-1.34) | 1.13 (0.98-1.31) | 0.03  |
| <b>12-year lag (exclude the first 12 years of follow-up)</b> |             |                  |                  |                  |       |
| <b>Overall citrus</b>                                        | <2/wk       | 2-4/wk           | 5-6/wk           | ≥1/d             |       |
| No. of cases/person-years                                    | 223/196,266 | 202/156,566      | 296/184,040      | 508/327,979      |       |
| Multivariable-adjusted hazard ratio (95% CI)*                | 1.00        | 1.05 (0.84-1.31) | 1.26 (1.06-1.51) | 1.22 (1.03-1.44) | 0.006 |
| <b>Grapefruit</b>                                            | Never       | <1/wk            | 1/wk             | ≥2/wk            |       |
| No. of cases/person-years                                    | 286/259,675 | 363/268,981      | 229/152,147      | 351/184,046      |       |
| Multivariable-adjusted hazard ratio (95% CI)†                | 1.00        | 1.06 (0.90-1.25) | 1.18 (0.98-1.43) | 1.40 (1.16-1.70) | 0.001 |
| <b>Grapefruit juice</b>                                      | Never       | <1/wk            | 1/wk             | ≥2/wk            |       |
| No. of cases/person-years                                    | 695/521,633 | 284/181,317      | 103/66,532       | 147/95,367       |       |
| Multivariable-adjusted hazard ratio (95% CI)†                | 1.00        | 1.02 (0.88-1.18) | 1.01 (0.81-1.25) | 1.01 (0.71-1.41) | 0.98  |

|                                                   |             |                  |                  |                  |        |
|---------------------------------------------------|-------------|------------------|------------------|------------------|--------|
| <b>Grapefruit and grapefruit juice (combined)</b> | Never       | <1/wk            | 1/wk             | ≥2/wk            |        |
| No. of cases/person-years                         | 246/222,071 | 257/197,605      | 215/151,769      | 511/293,404      |        |
| Multivariable-adjusted hazard ratio (95% CI)†     | 1.00        | 1.02 (0.85-1.22) | 1.11 (0.91-1.35) | 1.28 (1.08-1.51) | <0.001 |
| <b>Oranges</b>                                    | Never       | ≤1/wk            | 2/wk             | ≥3/wk            |        |
| No. of cases/person-years                         | 129/126,009 | 609/415,785      | 181/111,555      | 310/211,501      |        |
| Multivariable-adjusted hazard ratio (95% CI)†     | 1.00        | 1.29 (1.06-1.57) | 1.21 (0.95-1.54) | 1.14 (0.92-1.42) | 0.69   |
| <b>Orange juice</b>                               | <1/wk       | 1-2/wk           | 3-4/wk           | ≥5/wk            |        |
| No. of cases/person-years                         | 317/248,817 | 244/183,161      | 243/161,680      | 425/271,194      |        |
| Multivariable-adjusted hazard ratio (95% CI)†     | 1.00        | 0.97 (0.81-1.15) | 1.13 (0.84-1.51) | 1.16 (0.99-1.35) | 0.02   |

---

**14-year lag (exclude the first 14 years of follow-up)**

|                                                   |             |                  |                  |                  |       |
|---------------------------------------------------|-------------|------------------|------------------|------------------|-------|
| <b>Overall citrus</b>                             | <2/wk       | 2-4/wk           | 5-6/wk           | ≥1/d             |       |
| No. of cases/person-years                         | 210/163,645 | 173/126,158      | 242/145,980      | 440/267,177      |       |
| Multivariable-adjusted hazard ratio (95% CI)*     | 1.00        | 1.01 (0.83-1.24) | 1.18 (0.98-1.42) | 1.15 (0.97-1.37) | 0.05  |
| <b>Grapefruit</b>                                 | Never       | <1/wk            | 1/wk             | ≥2/wk            |       |
| No. of cases/person-years                         | 259/219,234 | 313/215,761      | 207/123,974      | 286/143,991      |       |
| Multivariable-adjusted hazard ratio (95% CI)†     | 1.00        | 1.12 (0.94-1.33) | 1.27 (1.04-1.56) | 1.43 (1.13-1.81) | 0.004 |
| <b>Grapefruit juice</b>                           | Never       | <1/wk            | 1/wk             | ≥2/wk            |       |
| No. of cases/person-years                         | 623/433,662 | 234/141,120      | 87/53,365        | 121/74,813       |       |
| Multivariable-adjusted hazard ratio (95% CI)†     | 1.00        | 1.03 (0.88-1.21) | 0.99 (0.79-1.26) | 1.03 (0.67-1.60) | 0.94  |
| <b>Grapefruit and grapefruit juice (combined)</b> | Never       | <1/wk            | 1/wk             | ≥2/wk            |       |
| No. of cases/person-years                         | 222/188,342 | 228/158,937      | 194/123,545      | 421/232,136      |       |
| Multivariable-adjusted hazard ratio (95% CI)†     | 1.00        | 1.11 (0.92-1.34) | 1.20 (0.98-1.47) | 1.32 (1.11-1.58) | 0.001 |

|                                               |             |                  |                  |                  |      |
|-----------------------------------------------|-------------|------------------|------------------|------------------|------|
| <b>Oranges</b>                                | Never       | ≤1/wk            | 2/wk             | ≥3/wk            |      |
| No. of cases/person-years                     | 129/107,773 | 536/341,113      | 145/82,089       | 255/171,986      |      |
| Multivariable-adjusted hazard ratio (95% CI)† | 1.00        | 1.22 (1.00-1.49) | 1.23 (0.95-1.59) | 1.03 (0.82-1.29) | 0.39 |
| <b>Orange juice</b>                           | <1/wk       | 1-2/wk           | 3-4/wk           | ≥5/wk            |      |
| No. of cases/person-years                     | 301/206,976 | 206/145,746      | 181/129,604      | 377/220,633      |      |
| Multivariable-adjusted hazard ratio (95% CI)† | 1.00        | 0.92 (0.76-1.10) | 0.94 (0.65-1.35) | 1.11 (0.95-1.30) | 0.16 |

\* Multivariable analyses were adjusted for age, family history of melanoma, natural hair color, number of arm moles, sunburn susceptibility as a child/adolescent, number of lifetime blistering sunburns, cumulative UV flux since baseline, average time spent in direct sunlight since high school, body mass index, physical activity, smoking status, intakes of total energy, alcohol, coffee and vitamin C from supplement. Analyses for women were also adjusted for menopausal status and postmenopausal hormone use. For further details of these variables, see the Table A4 footnote. Results among women and men were pooled using the random-effects model. CI denotes confidence interval.

† Multivariable analyses were additionally adjusted for consumption of the other individual citrus products listed in the table. Multivariable analyses for the combined grapefruit and grapefruit juice were additionally adjusted for consumption of oranges and orange juice.



**Table A7. Pooled multivariable-adjusted hazard ratios for incident melanoma according to frequency of grapefruit consumption in subgroups of host risk factors and sun exposure related factors.\***

|                                   |                                              | Grapefruit serving category |                  |                  |                  | P for trend | P for interaction† |
|-----------------------------------|----------------------------------------------|-----------------------------|------------------|------------------|------------------|-------------|--------------------|
|                                   |                                              | Never                       | <1/wk            | 1/wk             | ≥2/wk            |             |                    |
| <b>Family history of melanoma</b> |                                              |                             |                  |                  |                  |             |                    |
| No                                | No. of person-years                          | 486,419                     | 607,699          | 332,555          | 456,182          |             |                    |
|                                   | No. of cases                                 | 277                         | 523              | 315              | 508              |             |                    |
|                                   | Multivariable-adjusted hazard ratio (95% CI) | 1.00                        | 1.19 (1.02-1.39) | 1.34 (1.12-1.59) | 1.38 (1.17-1.62) | <0.001      | 0.84               |
| Yes                               | No. of person-years                          | 28,743                      | 39,325           | 22,177           | 29,332           |             |                    |
|                                   | No. of cases                                 | 40                          | 66               | 38               | 73               |             |                    |
|                                   | Multivariable-adjusted hazard ratio (95% CI) | 1.00                        | 1.07 (0.63-1.79) | 1.09 (0.64-1.87) | 1.22 (0.45-3.28) | 0.61        |                    |
| <b>Natural hair color</b>         |                                              |                             |                  |                  |                  |             |                    |
| Red/blonde                        | No. of person-years                          | 59,904                      | 81,714           | 45,324           | 63,012           |             |                    |
|                                   | No. of cases                                 | 54                          | 105              | 64               | 97               |             |                    |
|                                   | Multivariable-adjusted hazard ratio (95% CI) | 1.00                        | 1.12 (0.79-1.58) | 1.15 (0.63-2.10) | 1.19 (0.81-1.74) | 0.60        |                    |
| Light brown                       | No. of person-years                          | 155,068                     | 211,996          | 120,569          | 157,572          |             | 0.24               |
|                                   | No. of cases                                 | 101                         | 201              | 129              | 208              |             |                    |
|                                   | Multivariable-adjusted hazard ratio (95% CI) | 1.00                        | 1.18 (0.92-1.53) | 1.41 (1.05-1.91) | 1.55 (1.18-2.03) | <0.001      |                    |
| Dark brown/black                  | No. of person-years                          | 215,514                     | 277,513          | 150,947          | 211,992          |             |                    |
|                                   | No. of cases                                 | 114                         | 211              | 124              | 211              |             |                    |
|                                   | Multivariable-adjusted hazard ratio (95% CI) | 1.00                        | 1.11 (0.87-1.42) | 1.19 (0.90-1.57) | 1.19 (0.92-1.54) | 0.21        |                    |
| <b>Presence of arm moles</b>      |                                              |                             |                  |                  |                  |             |                    |
| No                                | No. of person-years                          | 246,854                     | 332,379          | 185,213          | 255,007          |             |                    |
|                                   | No. of cases                                 | 119                         | 253              | 152              | 230              |             |                    |
|                                   | Multivariable-adjusted hazard ratio (95% CI) | 1.00                        | 1.32 (1.05-1.66) | 1.41 (1.08-1.83) | 1.33 (1.03-1.70) | 0.10        | 0.84               |

|                                                                |                                              |         |                  |                  |                  |        |      |
|----------------------------------------------------------------|----------------------------------------------|---------|------------------|------------------|------------------|--------|------|
| Yes                                                            | No. of person-years                          | 128,379 | 184,283          | 103,126          | 140,905          |        |      |
|                                                                | No. of cases                                 | 114     | 234              | 137              | 225              |        |      |
|                                                                | Multivariable-adjusted hazard ratio (95% CI) | 1.00    | 1.15 (0.90-1.46) | 1.24 (0.95-1.62) | 1.29 (0.88-1.90) | 0.21   |      |
| <b>Sunburn susceptibility as a child/adolescent</b>            |                                              |         |                  |                  |                  |        |      |
| None/some redness                                              | No. of person-years                          | 226,984 | 313,249          | 180,145          | 238,507          |        |      |
|                                                                | No. of cases                                 | 109     | 213              | 121              | 203              |        |      |
|                                                                | Multivariable-adjusted hazard ratio (95% CI) | 1.00    | 1.13 (0.88-1.44) | 1.07 (0.80-1.42) | 1.26 (0.97-1.65) | 0.17   | 0.40 |
| Burn or painful burn/blisters                                  | No. of person-years                          | 208,665 | 266,593          | 140,584          | 199,342          |        |      |
|                                                                | No. of cases                                 | 170     | 319              | 207              | 321              |        |      |
|                                                                | Multivariable-adjusted hazard ratio (95% CI) | 1.00    | 1.14 (0.94-1.39) | 1.43 (1.15-1.78) | 1.33 (1.04-1.71) | 0.002  |      |
| <b>Number of lifetime blistering sunburns</b>                  |                                              |         |                  |                  |                  |        |      |
| Low (<5)                                                       | No. of person-years                          | 171,907 | 225,683          | 126,436          | 178,800          |        |      |
|                                                                | No. of cases                                 | 94      | 152              | 93               | 155              |        |      |
|                                                                | Multivariable-adjusted hazard ratio (95% CI) | 1.00    | 0.97 (0.74-1.28) | 1.06 (0.52-2.16) | 1.00 (0.72-1.39) | 0.86   | 0.14 |
| High (≥5)                                                      | No. of person-years                          | 264,259 | 354,657          | 194,437          | 259,784          |        |      |
|                                                                | No. of cases                                 | 185     | 380              | 237              | 373              |        |      |
|                                                                | Multivariable-adjusted hazard ratio (95% CI) | 1.00    | 1.23 (1.02-1.48) | 1.45 (1.18-1.79) | 1.50 (1.13-1.98) | <0.001 |      |
| <b>Average time spent in direct sunlight since high school</b> |                                              |         |                  |                  |                  |        |      |
| Below median                                                   | No. of person-years                          | 161,074 | 221,403          | 117,171          | 159,892          |        |      |
|                                                                | No. of cases                                 | 111     | 216              | 113              | 186              |        |      |
|                                                                | Multivariable-adjusted hazard ratio (95% CI) | 1.00    | 1.15 (0.90-1.46) | 1.18 (0.88-1.57) | 1.18 (0.71-1.97) | 0.59   | 0.41 |
| Above median                                                   | No. of person-years                          | 170,667 | 249,167          | 144,447          | 183,309          |        |      |
|                                                                | No. of cases                                 | 107     | 253              | 152              | 260              |        |      |
|                                                                | Multivariable-adjusted hazard ratio (95% CI) | 1.00    | 1.30 (1.02-1.65) | 1.36 (1.04-1.78) | 1.54 (1.19-1.99) | 0.004  |      |

| <b>Annual UV flux at residence</b> |                                              |         |                  |                  |                  |        |      |
|------------------------------------|----------------------------------------------|---------|------------------|------------------|------------------|--------|------|
| Low (<113)                         | No. of person-years                          | 165,113 | 224,449          | 127,351          | 177,065          |        |      |
|                                    | No. of cases                                 | 115     | 196              | 119              | 199              |        |      |
|                                    | Multivariable-adjusted hazard ratio (95% CI) | 1.00    | 0.99 (0.77-1.26) | 1.09 (0.74-1.61) | 1.13 (0.87-1.47) | 0.21   | 0.22 |
| High (≥113)                        | No. of person-years                          | 350,050 | 422,575          | 227,380          | 308,449          |        |      |
|                                    | No. of cases                                 | 202     | 393              | 234              | 382              |        |      |
|                                    | Multivariable-adjusted hazard ratio (95% CI) | 1.00    | 1.28 (1.07-1.53) | 1.43 (1.17-1.76) | 1.50 (1.22-1.85) | <0.001 |      |

\* Multivariable analyses were adjusted for age, family history of melanoma, natural hair color, number of arm moles, sunburn susceptibility as a child/adolescent, number of lifetime blistering sunburns, cumulative UV flux since baseline, average time spent in direct sunlight since high school, body mass index, physical activity, smoking status, intakes of total energy, alcohol, coffee, vitamin C from supplement and the other individual citrus products (grapefruit juice, oranges and orange juice). Analyses for women were also adjusted for menopausal status and postmenopausal hormone use. For each stratified analysis, the stratifying variable was omitted from the model. Results among women and men were pooled using the random-effects model. CI denotes confidence interval.

† For the pooled analysis, P values for interactions were calculated using the Q statistic comparing the subgroup-specific pooled multivariable-adjusted hazard ratios for grapefruit consumption as a median trend variable.

**Table A8. Pooled multivariable-adjusted hazard ratios for incident melanoma according to frequency of grapefruit consumption in subgroups of additional potential confounders.\***

|                                                                              |                                              | Grapefruit serving category |                  |                  |                  | P for trend | P for interaction† |
|------------------------------------------------------------------------------|----------------------------------------------|-----------------------------|------------------|------------------|------------------|-------------|--------------------|
|                                                                              |                                              | Never                       | <1/wk            | 1/wk             | ≥2/wk            |             |                    |
| <b>Total other fruit and juice (13 items, except citrus products) intake</b> |                                              |                             |                  |                  |                  |             |                    |
| Low (<1.6/d)                                                                 | No. of person-years                          | 415,413                     | 454,529          | 193,860          | 135,399          |             |                    |
|                                                                              | No. of cases                                 | 248                         | 396              | 178              | 150              |             |                    |
|                                                                              | Multivariable-adjusted hazard ratio (95% CI) | 1.00                        | 1.16 (0.95-1.43) | 1.26 (1.02-1.56) | 1.29 (1.04-1.61) | 0.02        | 0.77               |
| High (≥1.6/d)                                                                | No. of person-years                          | 99,749                      | 192,494          | 160,872          | 350,116          |             |                    |
|                                                                              | No. of cases                                 | 69                          | 193              | 175              | 431              |             |                    |
|                                                                              | Multivariable-adjusted hazard ratio (95% CI) | 1.00                        | 1.18 (0.71-1.97) | 1.33 (0.84-2.13) | 1.36 (1.01-1.84) | 0.01        |                    |
| <b>Total vegetable (26 items) intake</b>                                     |                                              |                             |                  |                  |                  |             |                    |
| Low (<3.5/d)                                                                 | No. of person-years                          | 379,383                     | 422,919          | 194,670          | 210,894          |             |                    |
|                                                                              | No. of cases                                 | 241                         | 360              | 203              | 256              |             |                    |
|                                                                              | Multivariable-adjusted hazard ratio (95% CI) | 1.00                        | 1.04 (0.87-1.24) | 1.29 (1.05-1.58) | 1.29 (1.06-1.57) | 0.001       | 0.51               |
| High (≥3.5/d)                                                                | No. of person-years                          | 135,780                     | 224,104          | 160,063          | 274,619          |             |                    |
|                                                                              | No. of cases                                 | 76                          | 229              | 150              | 325              |             |                    |
|                                                                              | Multivariable-adjusted hazard ratio (95% CI) | 1.00                        | 1.47 (1.09-2.00) | 1.35 (1.00-1.81) | 1.52 (1.15-2.00) | 0.06        |                    |
| <b>Physical screening during the previous two years‡</b>                     |                                              |                             |                  |                  |                  |             |                    |
| No                                                                           | No. of person-years                          | 183,531                     | 208,884          | 107,834          | 145,727          |             |                    |
|                                                                              | No. of cases                                 | 106                         | 167              | 93               | 156              |             |                    |
|                                                                              | Multivariable-adjusted hazard ratio (95% CI) | 1.00                        | 1.20 (0.93-1.55) | 1.36 (1.00-1.84) | 1.55 (1.17-2.05) | 0.002       | 0.24               |
| Yes                                                                          | No. of person-years                          | 213,879                     | 345,796          | 188,157          | 279,878          |             |                    |
|                                                                              | No. of cases                                 | 175                         | 392              | 231              | 392              |             |                    |
|                                                                              | Multivariable-adjusted hazard ratio (95% CI) | 1.00                        | 1.22 (1.01-1.48) | 1.30 (1.05-1.61) | 1.32 (1.08-1.61) | 0.045       |                    |

\* Multivariable analyses were adjusted for age, family history of melanoma, natural hair color, number of arm moles, sunburn susceptibility as a child/adolescent, number of lifetime blistering sunburns, cumulative UV flux since baseline, average time spent in direct sunlight since high school, body mass index, physical activity, smoking status, intakes of total energy, alcohol, coffee, vitamin C from supplement and the other individual citrus products (grapefruit juice, oranges and orange juice). Analyses for women were also adjusted for menopausal status and postmenopausal hormone use. Results among women and men were pooled using the random-effects model. CI denotes confidence interval.

† For the pooled analysis, P values for interactions were calculated using the Q statistic comparing the subgroup-specific pooled multivariable-adjusted hazard ratios for grapefruit consumption as a median trend variable.

‡ Physical screening during the previous two years was asked biennially since 1988 among both women and men.
